# Supplementary material
Source: Royal Society of Chemistry journal article supplement (doi:10.1039/d6dt00604c)
Supplement: d6dt00604c1.pdf [file d6dt00604c1.pdf]

## Supplementary Information

# Lithium Storage Properties of Nucleation-Dominated Manganese Carbonate Nanoparticles

*Yun Seong Ahn,<sup>a</sup> Zahid Husain Momin,<sup>a</sup> Joo-Young Han,<sup>a</sup> Nguyen Van Du,<sup>b</sup> Jong-Min Oh,<sup>a</sup> Sang-Mo Koo,<sup>a</sup> Jong Ho Won,<sup>c</sup> Se Yun Kim,<sup>d</sup> Jae-Geun Ha<sup>a,\*</sup>, Joonwon Lim,<sup>e,\*</sup> and Weon Ho Shin<sup>a,\*</sup>*

<sup>a</sup> Department of Electronic Materials Engineering, Kwangwoon University, Seoul 01897, Republic of Korea.

<sup>b</sup> Faculty of Fundamental Science, Phenikaa University, Yen Nghia, Ha-Dong District, Hanoi, 10000, Vietnam.

<sup>c</sup> Department of Energy Engineering, Dankook University, Cheonan-si, Chungnam 31116, Republic of Korea.

<sup>d</sup> Department of Materials Engineering and Convergence Technology, Gyeongsang National University, Jinju 52828, Republic of Korea.

<sup>e</sup> Department of Information Display, Kyung Hee University, Seoul 02447, Republic of Korea

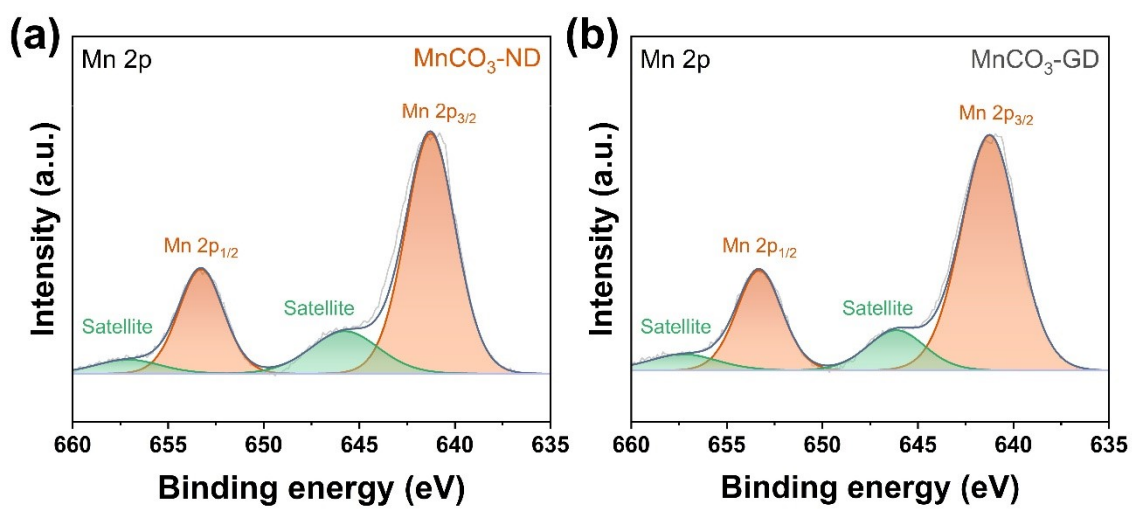

**Figure S1.** XPS Mn 2p spectra of (a) MnCO<sub>3</sub>-ND and (b) MnCO<sub>3</sub>-GD.

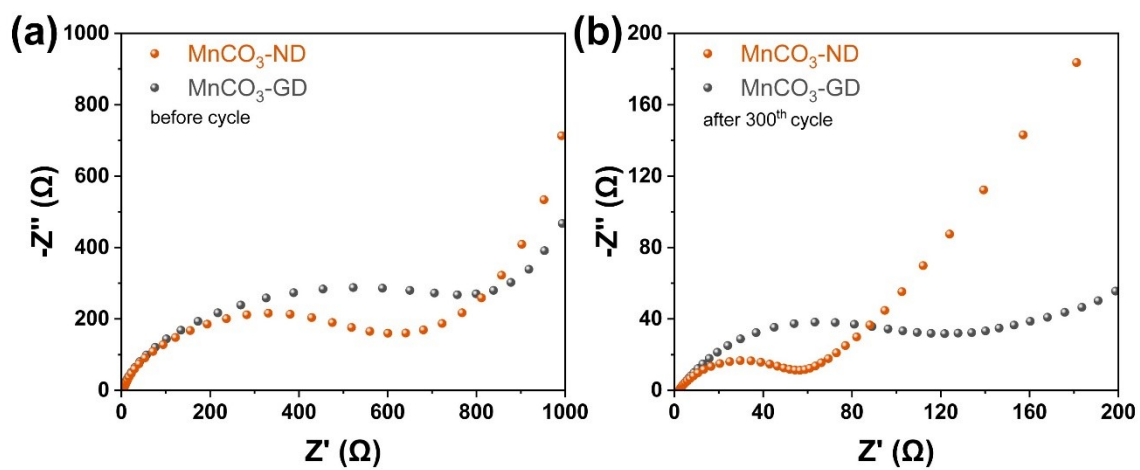

**Figure S2.** Nyquist plots of MnCO<sub>3</sub>-ND and MnCO<sub>3</sub>-GD electrodes (a) before cycling and (b) after 300 cycles at 1.0 A g<sup>-1</sup>.

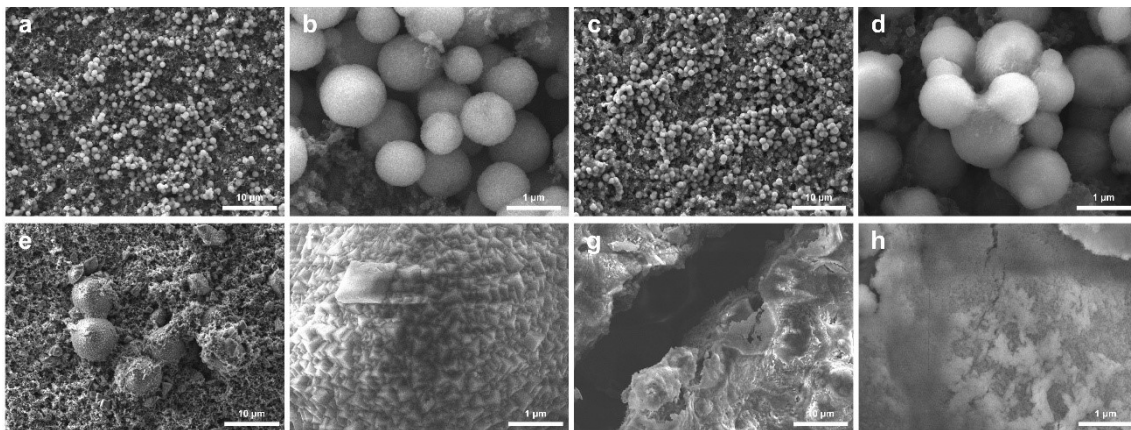

**Figure S3.** SEM images of MnCO<sub>3</sub> electrodes at a current density of 1.0 A g<sup>-1</sup>: (a and b) MnCO<sub>3</sub>-ND before cycling; (c and d) MnCO<sub>3</sub>-ND after 100 cycles; (e and f) MnCO<sub>3</sub>-GD before cycling; (g and h) MnCO<sub>3</sub>-GD after 100 cycles.
